# Supplementary material for: Dipeptidase-1–knockout mice develop invasive tumors with features of microsatellite-unstable colorectal cancer
Source: JCI journal article supplement (doi:10.1172/jci.insight.186938), 2025-04-03
Supplement: sd1 [file 1]

## Supplemental Figure 1

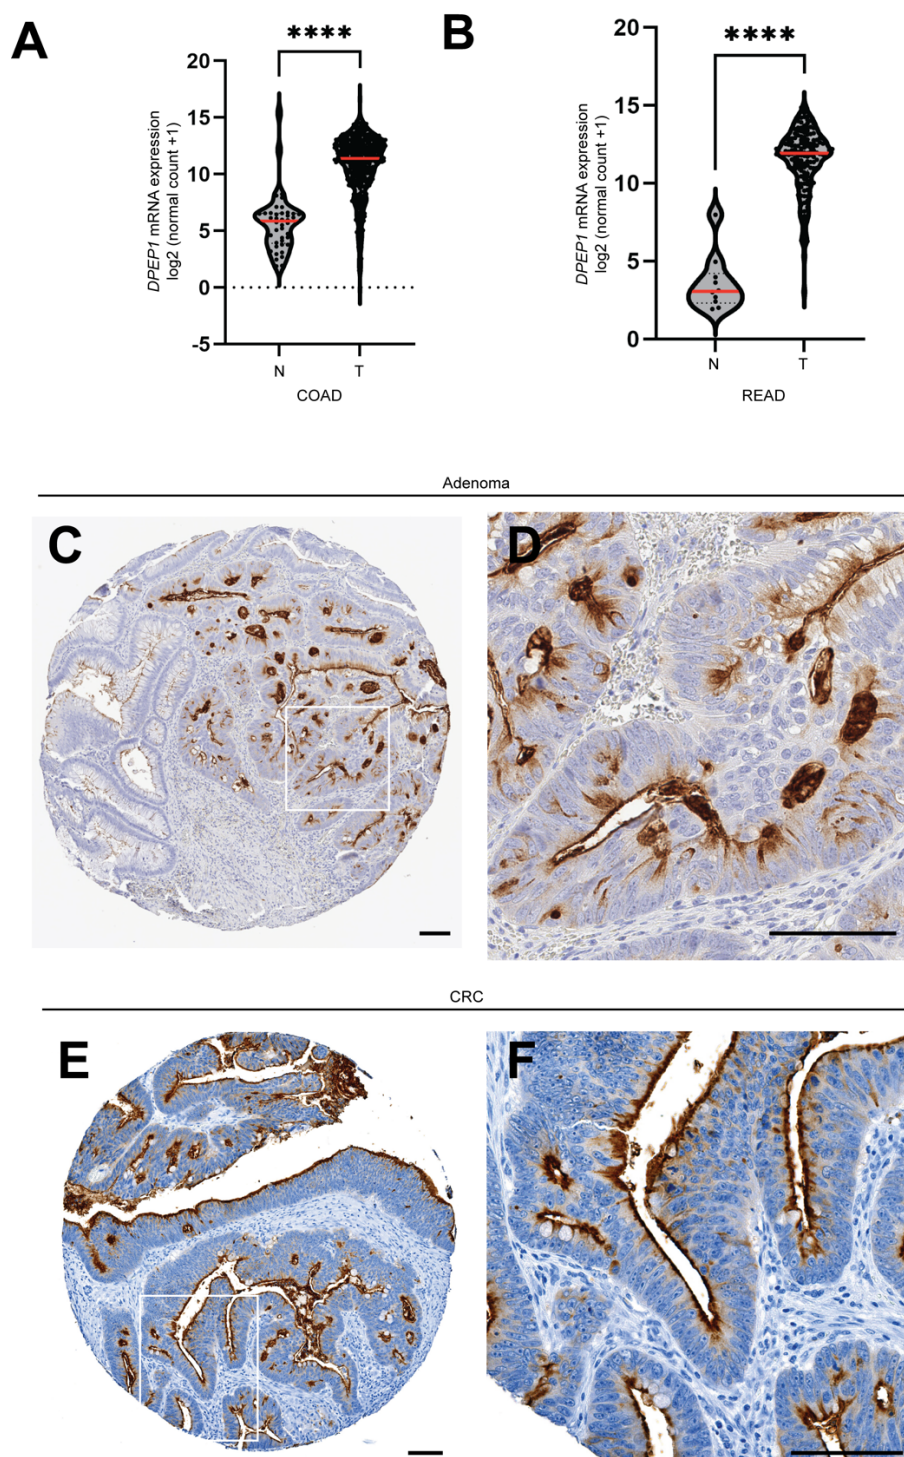

### Supplemental Figure 1 legend

#### **DPEP1 is increased in colorectal adenomas and cancers.**

DPEP1 mRNA expression in **(A)** colon cancer (n = 492) and **(B)** rectal cancer (n = 170) in comparison to normal adjacent tissues using TCGA datasets. Immunohistochemical staining of DPEP1 in **(C-D)** adenoma (n = 336 total cores assessed) and **(E-F)** CRC tissue samples (n = 249 total cores assessed) with boxed portions magnified to the right. Median denoted in red. N, normal adjacent tissue. T, tumor tissue. Four asterisks denote a p-value < .0001. Scale bar, 100  $\mu$ m. Data are representative images. COAD, colon adenocarcinoma; READ, rectum adenocarcinoma. Wilcoxon-Mann-Whitney test was used for assessing statistical significance.

## Supplemental Figure 2

**A**

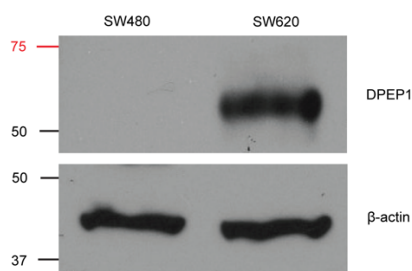

**B**

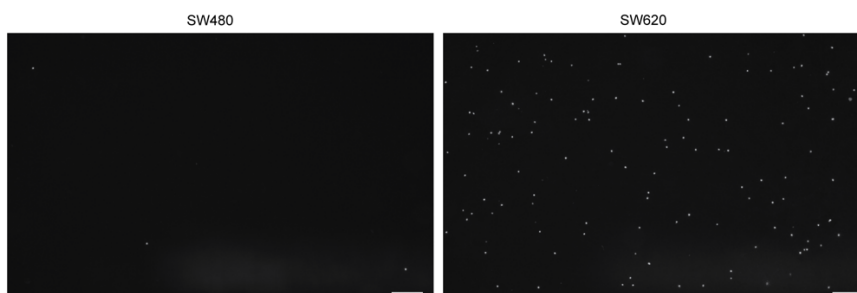

**C**

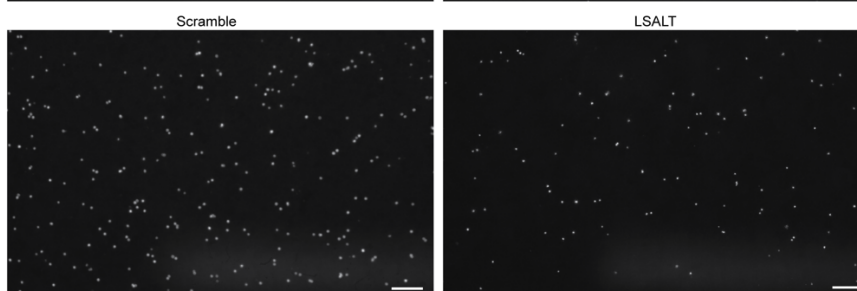

**D**

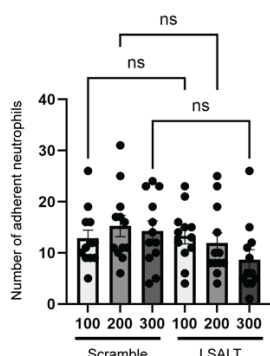

**E**

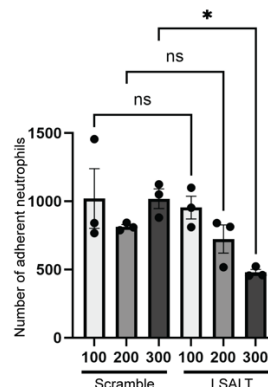

### Supplemental Figure 2 Legend

#### DPEP1 expression in CRC lines is correlated with neutrophil binding ability.

(A) Immunoblot probing DPEP1 in SW480 and SW620 lysates with  $\beta$ -actin used as a loading control (B) Representative images of neutrophils bound to SW480 or SW620 cells (C) Representative images of neutrophils bound to SW620 cells treated with either 300  $\mu$ M scrambled or LSALT peptide (D) Quantification of neutrophil binding assay for SW480 cells treated with scrambled or LSALT peptide in the designated concentrations in  $\mu$ M as indicated on the plot where each FOV is an individual data point (n = 12 FOV per condition). (E) Quantification of neutrophil binding assay for SW620 cells treated with scrambled or LSALT peptide in the designated concentrations in  $\mu$ M as indicated on the plot where each well is an individual data point (n = 3 wells per condition). Data are representative images. Scale bar, 200  $\mu$ m. Binding assays were conducted in triplicate. Error bars represent SEM. ns, no significance One asterisk denotes a p-value < .05. Kruskal-Wallis test was used for assessing statistical significance.

## Supplemental Figure 3

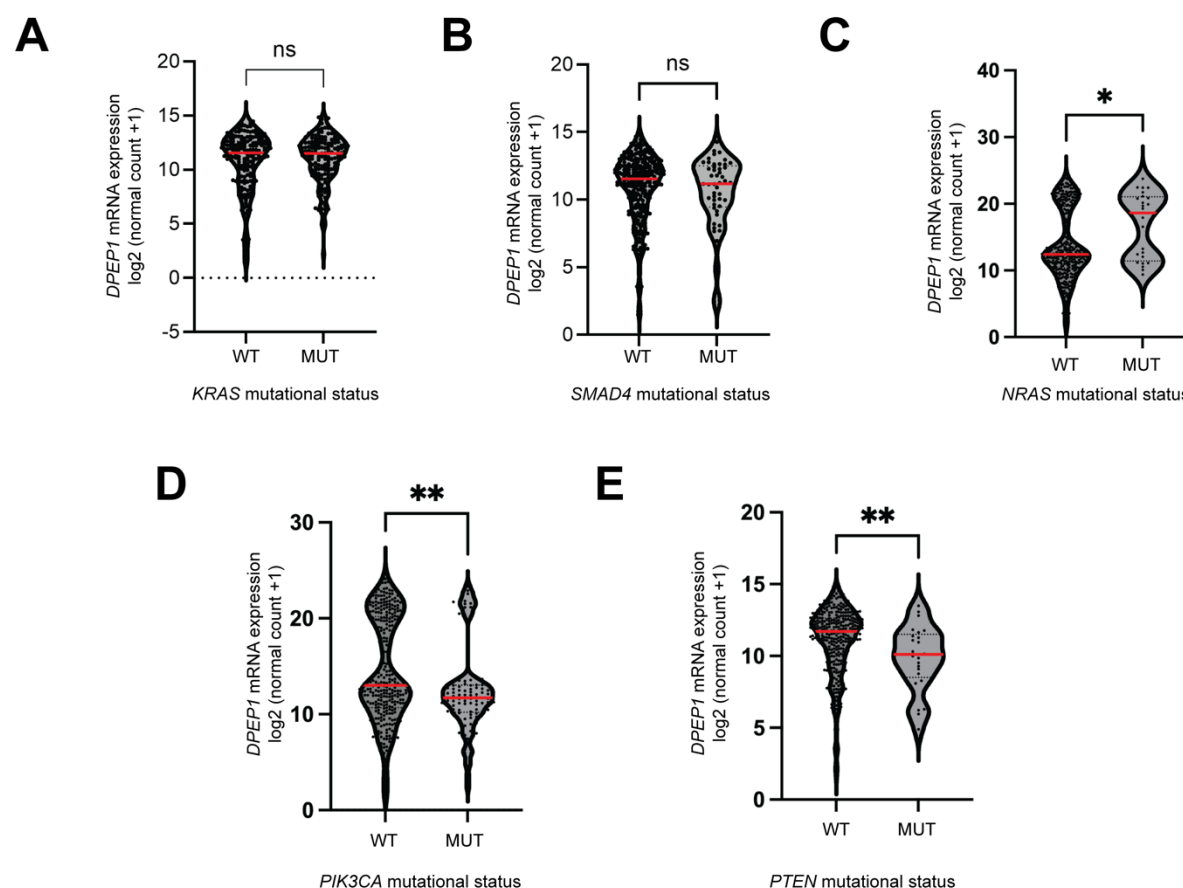

### Supplemental Figure 3 Legend

#### DPEP1 expression is not associated with *KRAS* and *SMAD4* mutations.

DPEP1 mRNA expression of TCGA database COAD and READ cohorts as it relates to (A) *KRAS* (n = 355) and (B) *SMAD4* (n = 357) mutational status and pathogenic variant mutational status of (C) *NRAS* (n = 400), (D) *PIK3CA* (n = 397), and (E) *PTEN* (n = 352). ns, no significance. One asterisk denotes a p-value < .05. Two asterisks denote a p-value < .01. Wilcoxon-Mann-Whitney test was used for assessing statistical significance.



## Supplemental Figure 4

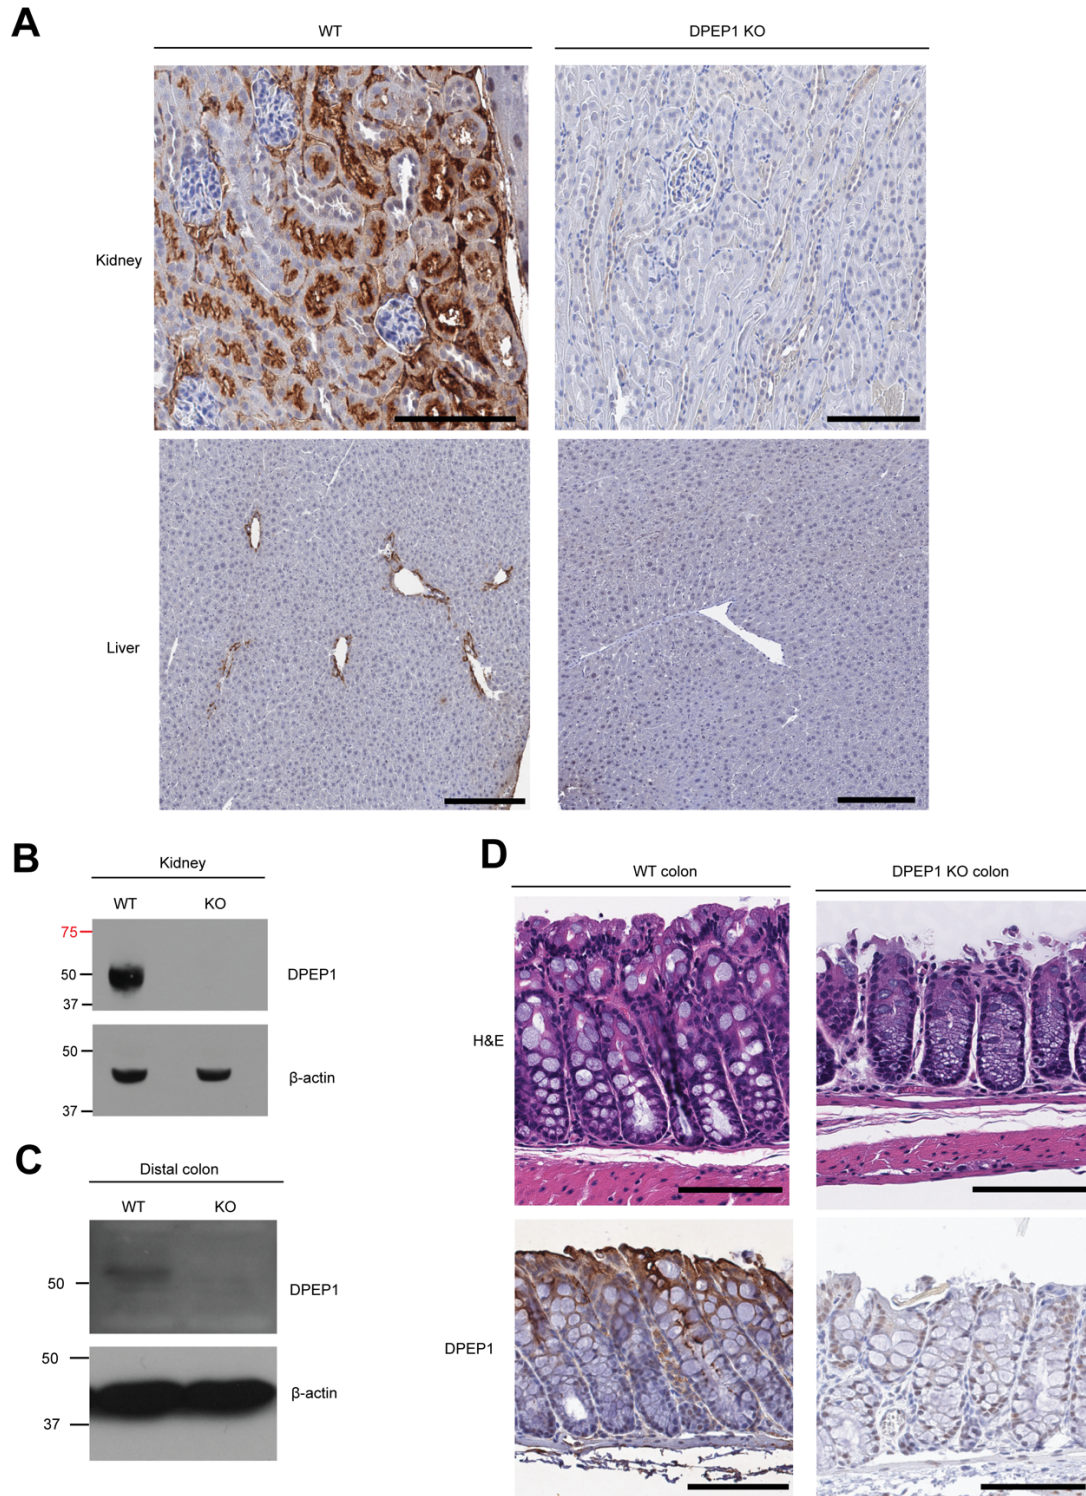

### Supplemental Figure 4 Legend

**DPEP1 KO is confirmed by IHC and immunoblotting.**

**(A)** DPEP1 IHC for mouse kidney and liver tissues from WT (IHC score = 3) and DPEP1 KO (IHC score = 0) mice. Immunoblot of whole tissue lysate of mouse **(B)** kidney and **(C)** distal colon isolated from WT and DPEP1 KO mice for DPEP1 and  $\beta$ -actin (loading control). **(D)** H&E and DPEP1 IHC for mouse colon tissues from WT (IHC score = 3) and DPEP1 KO (IHC score = 0) mice. Scale bar, 200  $\mu$ m for liver, 100  $\mu$ m for all others.



## Supplemental Figure 5

### A

Adenoma

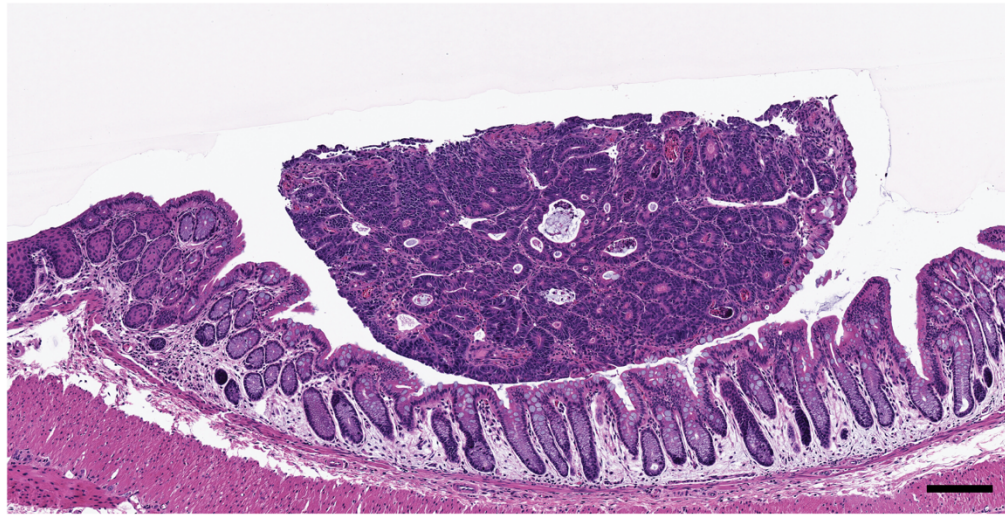

### B

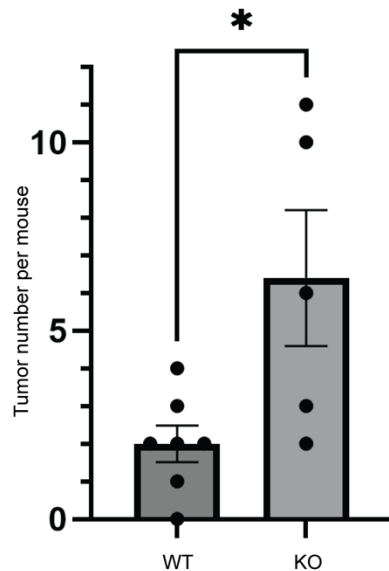

### C

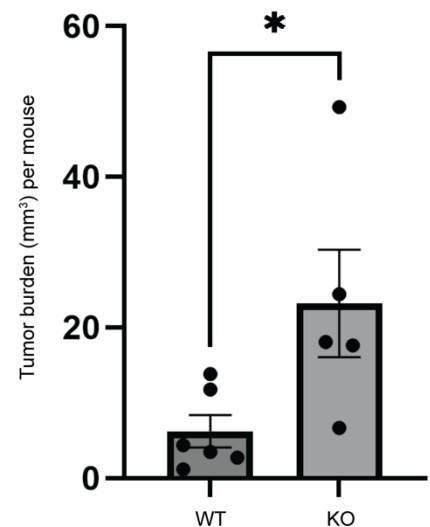

### Supplemental Figure 5 Legend

**The presence of SCC in DPEP1 KO mice does not skew the observed difference in tumor number and burden between WT and DPEP1 KO mice.**

**(A)** Representative H&E image of WT adenoma from **Figure 3C** at a higher power. Scale bar, 150  $\mu$ m. **(B)** Quantification of tumor number per mouse comparing WT (n = 7) and DPEP1 KO (n = 5) mice following a regimen of AOM/DSS, only accounting for Ads and ACAs without the inclusion of SCC tumors. **(C)** Quantification of total tumor volume per mouse in WT (n = 7) and DPEP1 KO (n = 5) mice, only accounting for Ads and ACAs without the inclusion of SCC tumors. Error bars represent SEM. One asterisk denotes a p-value < .05. Wilcoxon-Mann-Whitney test was used for assessing statistical significance.

## Supplemental Figure 6

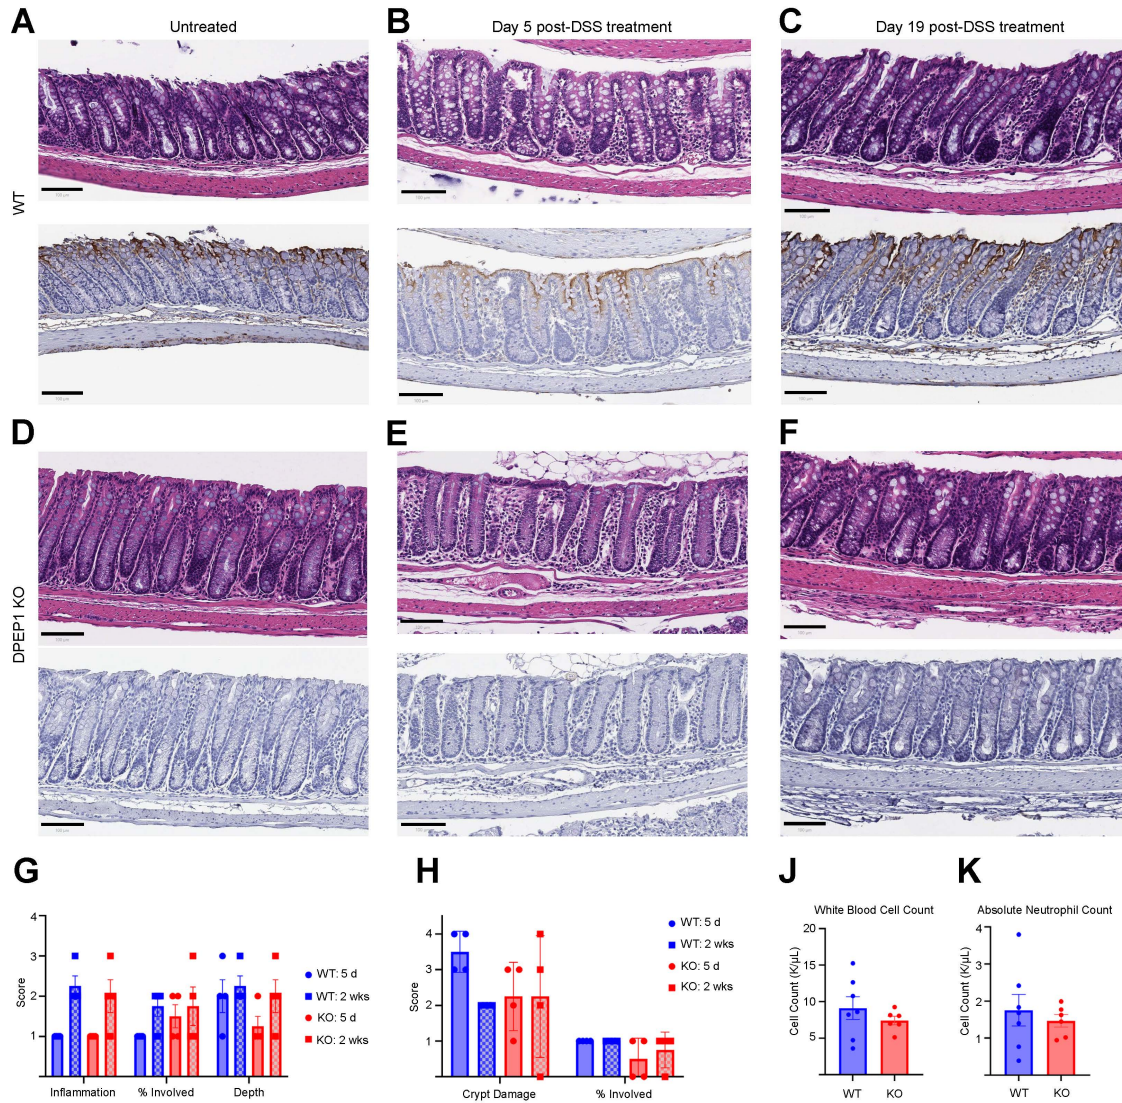

## Supplemental Figure 6 Legend

**There is no difference in DSS-induced inflammatory response comparing WT and DPEP1 KO mice.**

Representative H&E and IHC for DPEP1 in colon tissue for **(A)** WT untreated mice, **(B)** WT mice after 5 days of DSS treatment, or **(C)** WT mice after 2 weeks of resolution post-DSS regimen (19 days post start of DSS treatment). Representative H&E and IHC for DPEP1 in colon tissue for **(D)** DPEP1 KO untreated mice, **(E)** DPEP1 KO mice after 5 days of DSS treatment (day 0 post-DSS regimen), or **(F)** DPEP1 KO mice after 2 weeks of resolution post-DSS regimen (day 14). Expert pathological review of **(G)** DSS-induced inflammation and **(H)** crypt damage after 5 days of DSS treatment and 2 weeks of resolution post-DSS regimen. wks, weeks. N = 4 mice per group. Statistical significance was only observed between 5 d and 2 wks within the same genotype for inflammation scores. **(J)** White blood cell count and **(K)** absolute neutrophil count from peripheral blood of tumor-bearing mice. Statistical significance was not observed for **H - K** comparing WT (n = 7) and DPEP1 KO (n = 6) mice. Scale bar, 100  $\mu$ m. Error bars represent SEM. Kruskal-Wallis and Wilcoxon-Mann-Whitney test were used where appropriate for assessing statistical significance.

## Supplemental Figure 7

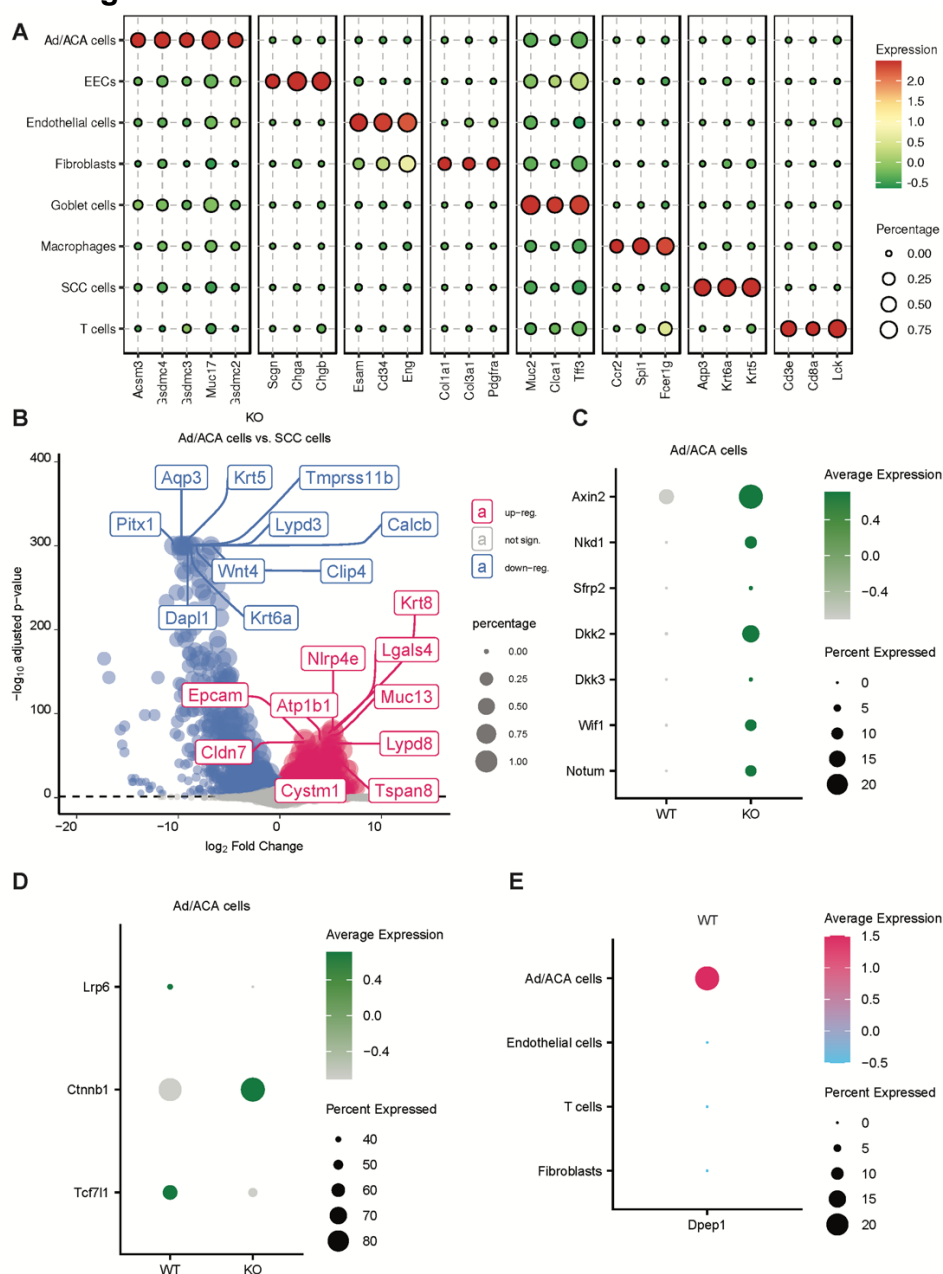

## Supplemental Figure 7 Legend

### A lack of DPEP1 results in two tumor phenotypes and impacts Wnt signaling mediators.

**(A)** Relative gene expression of representing cell type markers shown in bubble heatmap plot. **(B)** Volcano plot showing the DE genes between Ad/ACA cells and SCC in DPEP1 KO group; Pink dots shows the up-regulated genes in Ad/ACA cells, while blue dots shows the down-regulated genes in Ad/ACA cells; Size of dots show the larger percentage of cells expressing the gene in either groups; maximum y-axis was set to 300 for genes with adjusted p-value equal to 0; **(C)** Dot plot of Wnt negative regulator significantly DE genes between DPEP1 KO and WT groups in Ad/ACA cells (*Notom* Padj =  $4.5e-32$ ; *Wif1* Padj =  $8.7e-31$ ; *Dkk3* Padj = 0.014; *Dkk2* Padj =  $6.6e-53$ ; *Sfrp2* Padj =  $7.1e-3$ ; *Nkd1* Padj =  $1.1e-34$ ; *Axin2* Padj =  $3.1e-13$ ); **(D)** Dot plot of Wnt activator significantly DE genes between DPEP1 KO and WT groups in Ad/ACA cells (*Tcf7l1* Padj =  $7.0e-18$ ; *Ctnnb1* Padj =  $1.2e-20$ ; *Lrp6* Padj =  $5.1e-5$ ). **(E)** Dot plot of *Dpep1* expression in WT Ad/ACA cells, Endothelial cells, T cells, and Fibroblasts. Padj, adjusted p-value.



## Supplemental Figure 8

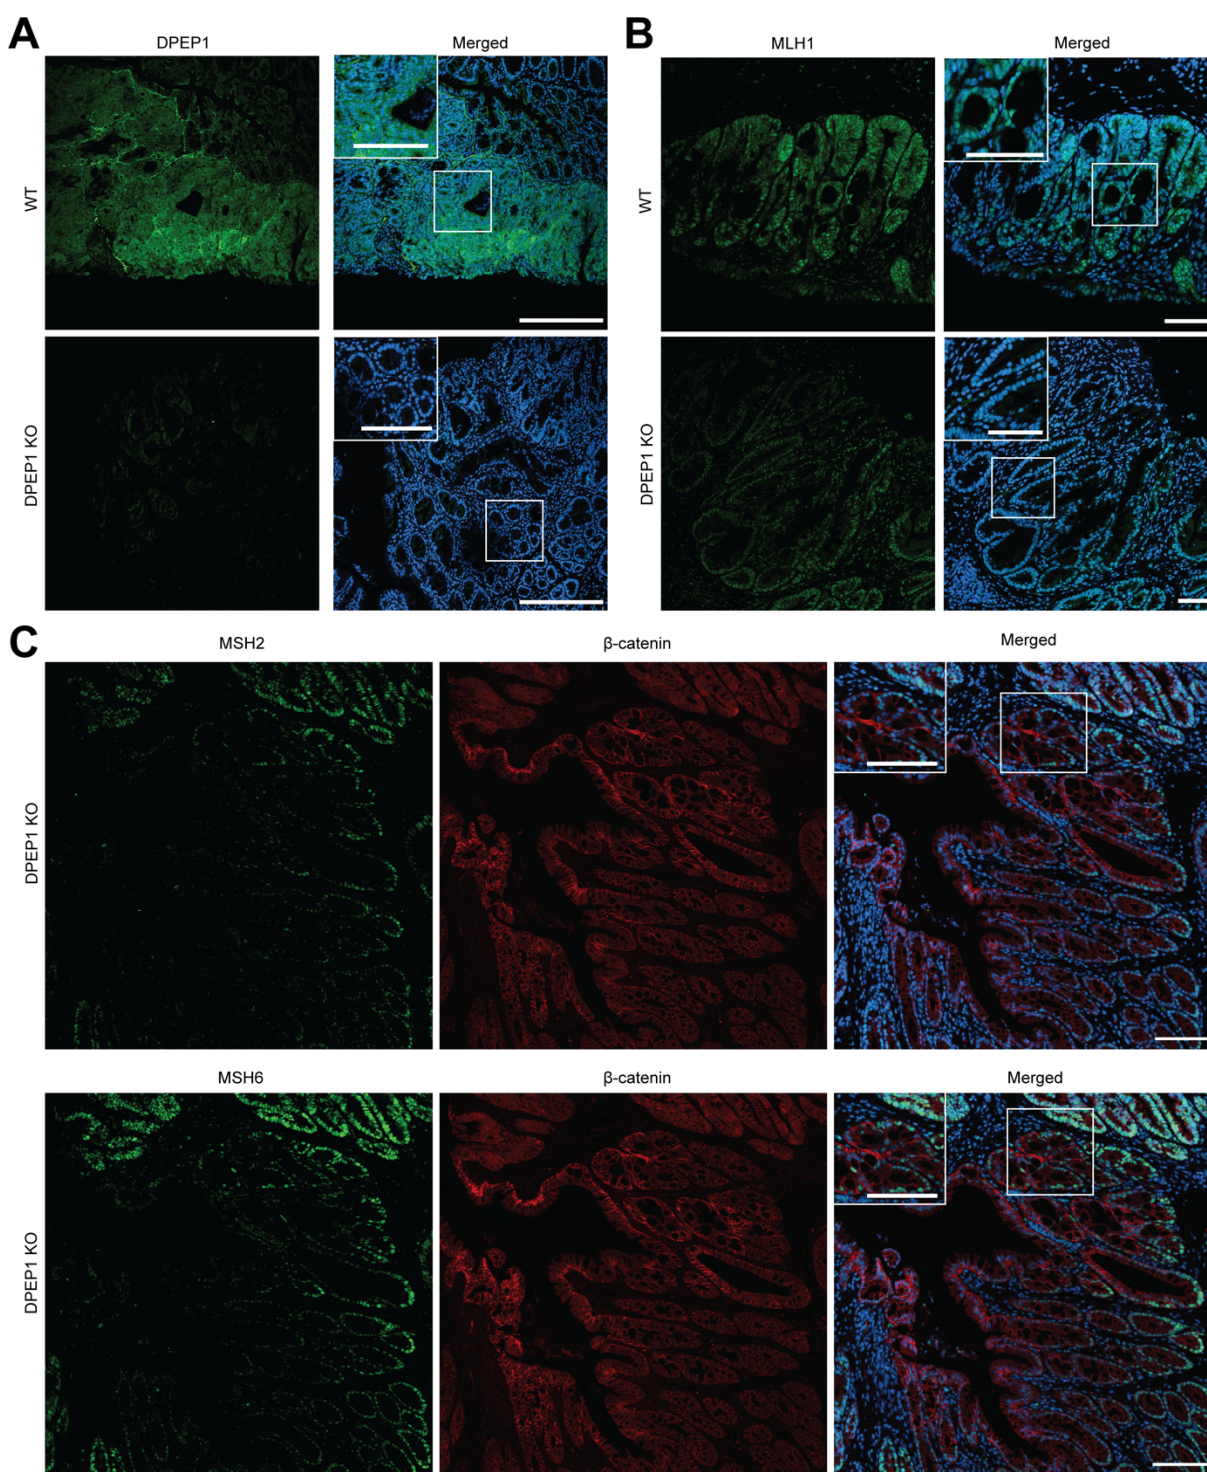

### Supplemental Figure 8 Legend

**DPEP1 KO is confirmed by immunofluorescence and is associated with reduced MLH1.**

Representative immunofluorescence images showing (A) DPEP1, (B) MLH1, or (C) MSH2, MSH6, and  $\beta$ -catenin staining and merged images with DAPI for WT Ads and DPEP1 KO ACAs formed by AOM/DSS. Scale bar, 500  $\mu$ m, insets 250  $\mu$ m, for A and 100  $\mu$ m for B and C. Representative images are a result of staining tumors from two cohorts described in the Methods where experiments were done in triplicate from WT (n = 12) and DPEP1 KO (n = 10) tumors.



## Supplemental Figure 9

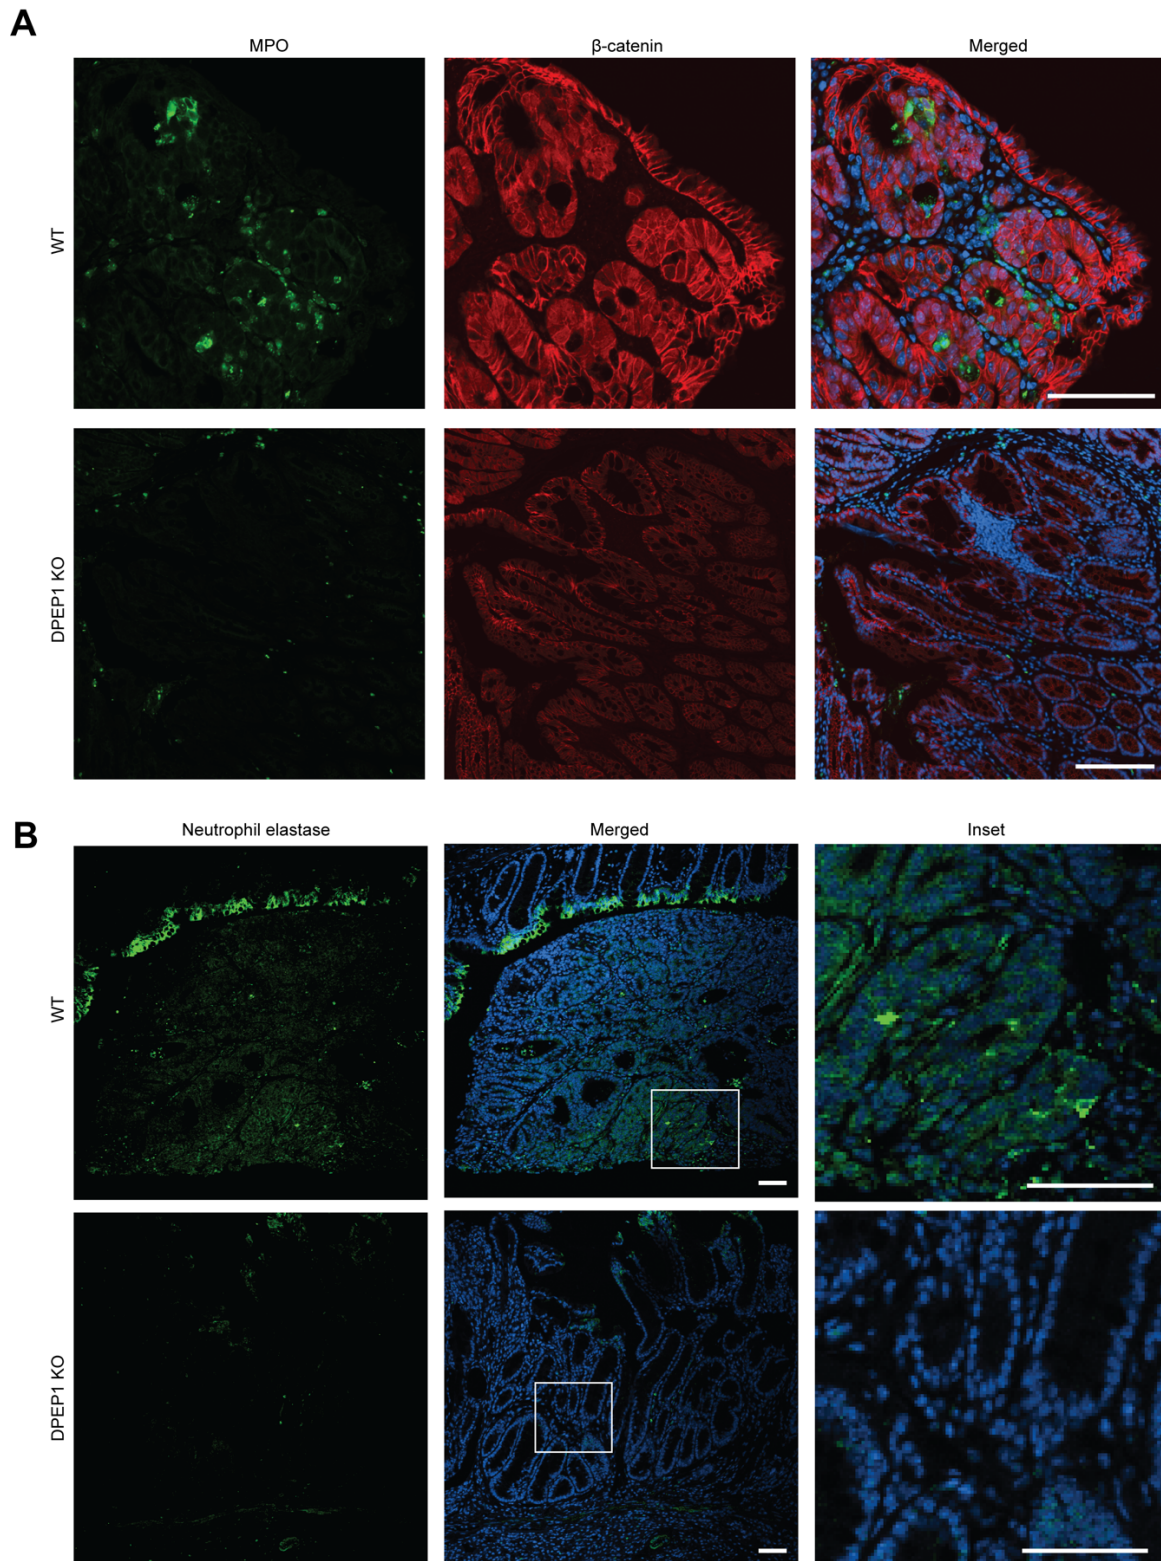

### Supplemental Figure 9 Legend

#### **A lack of DPEP1 leads to a decrease in activated neutrophils.**

Representative immunofluorescence images showing (A) MPO and  $\beta$ -catenin or (B) neutrophil elastase staining and merged images with DAPI for WT Ads and DPEP1 KO ACAs formed by AOM/DSS. Scale bar, 50  $\mu$ m for A and 100  $\mu$ m for B. Representative images are a result of staining tumors from two cohorts described in the Methods where experiments were done in triplicate from WT (n = 12) and DPEP1 KO (n = 10) tumors.
